# Supplementary material
Source: Springer Nature journal article supplement (https://www.springermedizin.de/resource/supplementary/13045_2012_228_MOESM7_ESM.pdf/9660910)
Supplement: MOESM7 [file 9660910]

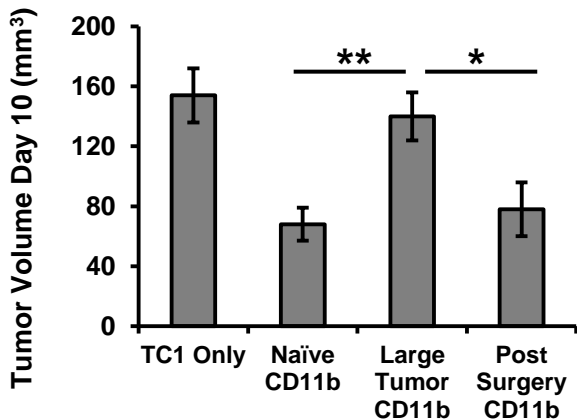

|                           |   |   |   |   |
|---------------------------|---|---|---|---|
| TC-1 Cells                | + | + | + | + |
| CD8* + Naïve CD11b        | - | + | - | - |
| CD8* + Tumor CD11b        | - | - | + | - |
| CD8* + Post-Surgery CD11b | - | - | - | + |

\*all CD8 T-cells were obtained from mice bearing small primary tumors and receiving AdV-tk (highly activated CD8 T-cells)

**A**
